# Supplementary material for: Cell Type-Specific Patterns in the Accumulation of DNA Damage Following Multifractional Radiation Exposure
Source: MDPI journal article supplement (doi:10.3390/ijms232112861), 2022-10-25
Supplement: s1 [file s1]

| <b>DFRE</b>                 |           |            |           |            |           |            |
|-----------------------------|-----------|------------|-----------|------------|-----------|------------|
| <b>VH10 (9 fractions)</b>   | <b>B0</b> | <b>SEM</b> | <b>B1</b> | <b>SEM</b> | <b>B2</b> | <b>SEM</b> |
| Control                     | 0.021     | 0.617      | 0.633     | 0.142      | -0.004    | 0.006      |
| 0.25Gy/fraction             | 0.022     | 0.575      | 0.561     | 0.132      | -0.005    | 0.006      |
| 0.5 Gy/fraction             | 0.036     | 0.528      | 0.472     | 0.121      | -0.007    | 0.006      |
| 1.0 Gy/fraction             | 0.050     | 0.508      | 0.421     | 0.117      | -0.008    | 0.005      |
| 2.0 Gy/fraction             | 0.010     | 0.586      | 0.419     | 0.135      | -0.011    | 0.006      |
| <b>DFRE</b>                 |           |            |           |            |           |            |
| <b>VH10 (12 fractions)</b>  | <b>B0</b> | <b>SEM</b> | <b>B1</b> | <b>SEM</b> | <b>B2</b> | <b>SEM</b> |
| Control                     | 0.066     | 0.717      | 0.605     | 0.121      | -0.003    | 0.004      |
| 0.25Gy/fraction             | 0.040     | 0.673      | 0.551     | 0.114      | -0.005    | 0.004      |
| 0.5 Gy/fraction             | 0.142     | 0.612      | 0.407     | 0.104      | -0.003    | 0.004      |
| 1.0 Gy/fraction             | 0.126     | 0.578      | 0.374     | 0.098      | -0.006    | 0.003      |
| 2.0 Gy/fraction             | 0.102     | 0.591      | 0.362     | 0.100      | -0.008    | 0.003      |
| <b>DFRE</b>                 |           |            |           |            |           |            |
| <b>AHH-1 (10 fractions)</b> | <b>B0</b> | <b>SEM</b> | <b>B1</b> | <b>SEM</b> | <b>B2</b> | <b>SEM</b> |
| Control                     | 0.095     | 0.193      | 0.859     | 0.074      | 0.019     | 0.006      |
| 0.25Gy/fraction             | 0.125     | 0.141      | 0.753     | 0.054      | 0.012     | 0.004      |
| 0.5 Gy/fraction             | 0.126     | 0.187      | 0.647     | 0.072      | 0.005     | 0.006      |
| 1.0 Gy/fraction             | 0.067     | 0.227      | 0.522     | 0.087      | -0.017    | 0.007      |
| 2.0 Gy/fraction             | 0.045     | 0.405      | 0.305     | 0.156      | -0.039    | 0.012      |

**Table S1.** Summary of B0, B1 and B2 coefficients from fitting the cell growth curves of VH10 fibroblasts (9 and 12 fractions) and AHH-1 lymphoblasts. DFRE during fractionated radiation exposure. Statistical analysis was carried out with GraphPad prism.

| PFRE                      |           |            |           |            |           |            |
|---------------------------|-----------|------------|-----------|------------|-----------|------------|
| <b>VH10 (9 fractions)</b> | <b>B0</b> | <b>SEM</b> | <b>B1</b> | <b>SEM</b> | <b>B2</b> | <b>SEM</b> |
| Control                   | 0.04      | 0.26       | 0.326     | 0.04       | 0.003     | 0.001      |
| 0.25Gy/fraction           | 0.05      | 0.45       | 0.311     | 0.07       | 0.003     | 0.002      |
| 0.5 Gy/fraction           | -0.01     | 0.40       | 0.298     | 0.06       | 0.002     | 0.002      |
| 1.0 Gy/fraction           | 0.02      | 0.55       | 0.132     | 0.09       | 0.002     | 0.003      |
| 2.0 Gy/fraction           | 0.16      | 0.88       | 0.070     | 0.14       | 0.005     | 0.005      |

  

| PFRE                       |           |            |           |            |           |            |
|----------------------------|-----------|------------|-----------|------------|-----------|------------|
| <b>VH10 (12 fractions)</b> | <b>B0</b> | <b>SEM</b> | <b>B1</b> | <b>SEM</b> | <b>B2</b> | <b>SEM</b> |
| Control                    | 0.104     | 1.07       | 0.30      | 0.17       | 0.004     | 0.005      |
| 0.25Gy/fraction            | 0.004     | 0.71       | 0.28      | 0.11       | 0.004     | 0.004      |
| 0.5 Gy/fraction            | -0.062    | 0.35       | 0.25      | 0.06       | -0.001    | 0.002      |
| 1.0 Gy/fraction            | -0.075    | 0.68       | 0.13      | 0.11       | 0.002     | 0.003      |
| 2.0 Gy/fraction            | -0.111    | 0.68       | -0.09     | 0.11       | 0.005     | 0.003      |

  

| PFRE                        |           |            |           |            |           |            |
|-----------------------------|-----------|------------|-----------|------------|-----------|------------|
| <b>AHH-1 (10 fractions)</b> | <b>B0</b> | <b>SEM</b> | <b>B1</b> | <b>SEM</b> | <b>B2</b> | <b>SEM</b> |
| Control                     | 0.07      | 0.237      | 1.080     | 0.06       | 0.002     | 0.003      |
| 0.25Gy/fraction             | 0.08      | 0.219      | 1.007     | 0.05       | 0.005     | 0.003      |
| 0.5 Gy/fraction             | 0.23      | 0.235      | 0.868     | 0.06       | 0.011     | 0.003      |
| 1.0 Gy/fraction             | 0.24      | 0.287      | 0.370     | 0.07       | 0.029     | 0.003      |
| 2.0 Gy/fraction             | 0.73      | 0.873      | 0.509     | 0.21       | 0.045     | 0.010      |

**Table S2.** Summary of B0, B1 and B2 coefficients from fitting the cell growth curves of VH10 fibroblasts (9 and 12 fractions) and AHH-1 lymphoblasts. PFRE post fractionated radiation exposure. Statistical analysis was carried out with GraphPad prism.

| <b>Cell growth</b>        |           |            |           |            |           |            |
|---------------------------|-----------|------------|-----------|------------|-----------|------------|
| <b>VH10 (9 fractions)</b> | <b>B0</b> | <b>SEM</b> | <b>B1</b> | <b>SEM</b> | <b>B2</b> | <b>SEM</b> |
| Control                   | -0.04     | 0.670      | 0.682     | 0.06       | -0.006    | 0.001      |
| 0.25Gy/fraction           | -0.26     | 0.780      | 0.563     | 0.07       | -0.005    | 0.001      |
| 0.5 Gy/fraction           | 0.00      | 0.720      | 0.391     | 0.07       | -0.002    | 0.001      |
| 1.0 Gy/fraction           | 0.38      | 0.810      | 0.258     | 0.08       | -0.001    | 0.001      |
| 2.0 Gy/fraction           | 0.75      | 1.140      | 0.161     | 0.11       | -0.001    | 0.002      |

  

| <b>Cell growth</b>         |           |            |           |            |           |            |
|----------------------------|-----------|------------|-----------|------------|-----------|------------|
| <b>VH10 (12 fractions)</b> | <b>B0</b> | <b>SEM</b> | <b>B1</b> | <b>SEM</b> | <b>B2</b> | <b>SEM</b> |
| Control                    | -0.071    | 1.23       | 0.67      | 0.10       | -0.006    | 0.002      |
| 0.25Gy/fraction            | 0.157     | 0.95       | 0.53      | 0.08       | -0.004    | 0.001      |
| 0.5 Gy/fraction            | 0.408     | 0.73       | 0.35      | 0.06       | -0.002    | 0.001      |
| 1.0 Gy/fraction            | 0.748     | 0.92       | 0.22      | 0.08       | -0.001    | 0.001      |
| 2.0 Gy/fraction            | 1.013     | 0.90       | 0.14      | 0.08       | -0.001    | 0.001      |

  

| <b>Cell growth</b>          |           |            |           |            |           |            |
|-----------------------------|-----------|------------|-----------|------------|-----------|------------|
| <b>AHH-1 (10 fractions)</b> | <b>B0</b> | <b>SEM</b> | <b>B1</b> | <b>SEM</b> | <b>B2</b> | <b>SEM</b> |
| Control                     | -0.64     | 0.206      | 1.13      | 0.03       | 0.000     | 0.001      |
| 0.25Gy/fraction             | -0.40     | 0.165      | 0.863     | 0.02       | 0.006     | 0.001      |
| 0.5 Gy/fraction             | -0.04     | 0.218      | 0.567     | 0.03       | 0.012     | 0.001      |
| 1.0 Gy/fraction             | 1.01      | 0.367      | -0.026    | 0.05       | 0.021     | 0.002      |
| 2.0 Gy/fraction             | 1.92      | 0.748      | -0.576    | 0.11       | 0.021     | 0.003      |

**Table S3.** Summary of B0, B1 and B2 coefficients from fitting the cell growth curves of VH10 fibroblasts (9 and 12 fractions) and AHH-1 lymphoblasts. PFRE post fractionated radiation exposure. Statistical analysis was carried out with GraphPad prism.

| <b>VH10 fibroblasts (9 fractions)</b> |                                |                         |                     |
|---------------------------------------|--------------------------------|-------------------------|---------------------|
| <b>DFRE</b>                           | <b>95% confidence interval</b> | <b>Adjusted p-Value</b> | <b>Significance</b> |
| Control vs 0.25 Gy/fraction           | -0.5307 to 0.6741              | 0.99                    | ns                  |
| Control vs 0.5 Gy/fraction            | -0.4414 to 0.7634              | 0.90                    | ns                  |
| Control vs 1.0 Gy/fraction            | -0.3905 to 0.8143              | 0.7739                  | ns                  |
| Control vs 2.0 Gy/fraction            | -0.3887 to 0.8161              | 0.7688                  | ns                  |
| 0.25 Gy/fraction vs 0.5 Gy/fraction   | -0.5131 to 0.6917              | 0.9868                  | ns                  |
| 0.25 Gy/fraction vs 1.0 Gy/fraction   | -0.4622 to 0.7426              | 0.9348                  | ns                  |
| 0.25 Gy/fraction vs 2.0 Gy/fraction   | -0.4604 to 0.7444              | 0.932                   | ns                  |
| 0.5 Gy/fraction vs 1.0 Gy/fraction    | -0.5515 to 0.6533              | 0.9985                  | ns                  |
| 0.5 Gy/fraction vs 2.0 Gy/fraction    | -0.5497 to 0.6551              | 0.9982                  | ns                  |
| 1.0 Gy/fraction vs 2.0 Gy/fraction    | -0.6006 to 0.6042              | >0.9999                 | ns                  |
|                                       |                                |                         |                     |
| <b>PFRE</b>                           | <b>95% confidence interval</b> | <b>Adjusted p-Value</b> | <b>Significance</b> |
| Control vs 0.25 Gy/fraction           | -0.3963 to 0.4269              | >0.9999                 | ns                  |
| Control vs 0.5 Gy/fraction            | -0.3834 to 0.4398              | 0.9993                  | ns                  |
| Control vs 1.0 Gy/fraction            | -0.2182 to 0.6050              | 0.5586                  | ns                  |
| Control vs 2.0 Gy/fraction            | -0.01147 to 0.8118             | 0.0576                  | ns                  |
| 0.25 Gy/fraction vs 0.5 Gy/fraction   | -0.3987 to 0.4245              | >0.9999                 | ns                  |
| 0.25 Gy/fraction vs 1.0 Gy/fraction   | -0.2335 to 0.5897              | 0.6275                  | ns                  |
| 0.25 Gy/fraction vs 2.0 Gy/fraction   | -0.02677 to 0.7965             | 0.0697                  | ns                  |
| 0.5 Gy/fraction vs 1.0 Gy/fraction    | -0.2464 to 0.5768              | 0.6857                  | ns                  |
| 0.5 Gy/fraction vs 2.0 Gy/fraction    | -0.03967 to 0.7836             | 0.0816                  | ns                  |
| 1.0 Gy/fraction vs 2.0 Gy/fraction    | -0.2049 to 0.6184              | 0.5                     | ns                  |
|                                       |                                |                         |                     |
| <b>CELL GROWTH</b>                    | <b>95% confidence interval</b> | <b>Adjusted p-Value</b> | <b>Significance</b> |
| Control vs 0.25 Gy/fraction           | -0.2565 to 0.4943              | 0.8306                  | ns                  |
| Control vs 0.5 Gy/fraction            | -0.08405 to 0.6668             | 0.1537                  | ns                  |
| Control vs 1.0 Gy/fraction            | 0.04835 to 0.7992              | 0.0259                  | *                   |
| Control vs 2.0 Gy/fraction            | 0.1458 to 0.8966               | 0.0071                  | **                  |
| 0.25 Gy/fraction vs 0.5 Gy/fraction   | -0.2029 to 0.5479              | 0.5778                  | ns                  |
| 0.25 Gy/fraction vs 1.0 Gy/fraction   | -0.07055 to 0.6803             | 0.1289                  | ns                  |
| 0.25 Gy/fraction vs 2.0 Gy/fraction   | 0.02685 to 0.7777              | 0.0347                  | *                   |
| 0.5 Gy/fraction vs 1.0 Gy/fraction    | -0.2430 to 0.5078              | 0.7724                  | ns                  |
| 0.5 Gy/fraction vs 2.0 Gy/fraction    | -0.1456 to 0.6052              | 0.3256                  | ns                  |
| 1.0 Gy/fraction vs 2.0 Gy/fraction    | -0.2780 to 0.4728              | 0.9072                  | ns                  |

**Table S4.** Summary of one-way ANOVA of the B1 coefficients cell growth curves of VH10 fibroblasts (9 fractions). DFRE during radiation exposure, PFRE post fractionated radiation exposure. Statistical analysis was carried out with GraphPad prism. \* represent p values <0.05, \*\* represents p values <0.01.

| <b>VH10 fibroblasts (12 fractions)</b> |                                |                         |                     |
|----------------------------------------|--------------------------------|-------------------------|---------------------|
| <b>DFRE</b>                            | <b>95% confidence interval</b> | <b>Adjusted p-Value</b> | <b>Significance</b> |
| Control vs 0.25 Gy/fraction            | -0.4467 to 0.5557              | 1.00                    | ns                  |
| Control vs 0.5 Gy/fraction             | -0.3027 to 0.6997              | 0.70                    | ns                  |
| Control vs 1.0 Gy/fraction             | -0.2697 to 0.7327              | 0.5732                  | ns                  |
| Control vs 2.0 Gy/fraction             | -0.2583 to 0.7441              | 0.5316                  | ns                  |
| 0.25 Gy/fraction vs 0.5 Gy/fraction    | -0.3572 to 0.6452              | 0.8727                  | ns                  |
| 0.25 Gy/fraction vs 1.0 Gy/fraction    | -0.3242 to 0.6782              | 0.7715                  | ns                  |
| 0.25 Gy/fraction vs 2.0 Gy/fraction    | -0.3128 to 0.6896              | 0.7318                  | ns                  |
| 0.5 Gy/fraction vs 1.0 Gy/fraction     | -0.4682 to 0.5342              | 0.9994                  | ns                  |
| 0.5 Gy/fraction vs 2.0 Gy/fraction     | -0.4568 to 0.5456              | 0.9981                  | ns                  |
| 1.0 Gy/fraction vs 2.0 Gy/fraction     | -0.4898 to 0.5126              | >0.9999                 | ns                  |
|                                        |                                |                         |                     |
| <b>PFRE</b>                            | <b>95% confidence interval</b> | <b>Adjusted p-Value</b> | <b>Significance</b> |
| Control vs 0.25 Gy/fraction            | -0.5274 to 0.5690              | >0.9999                 | ns                  |
| Control vs 0.5 Gy/fraction             | -0.4914 to 0.6050              | 0.9966                  | ns                  |
| Control vs 1.0 Gy/fraction             | -0.3792 to 0.7172              | 0.8431                  | ns                  |
| Control vs 2.0 Gy/fraction             | -0.1540 to 0.9423              | 0.2018                  | ns                  |
| 0.25 Gy/fraction vs 0.5 Gy/fraction    | -0.5122 to 0.5842              | 0.9994                  | ns                  |
| 0.25 Gy/fraction vs 1.0 Gy/fraction    | -0.4000 to 0.6964              | 0.8944                  | ns                  |
| 0.25 Gy/fraction vs 2.0 Gy/fraction    | -0.1748 to 0.9215              | 0.2404                  | ns                  |
| 0.5 Gy/fraction vs 1.0 Gy/fraction     | -0.4360 to 0.6604              | 0.9578                  | ns                  |
| 0.5 Gy/fraction vs 2.0 Gy/fraction     | -0.2108 to 0.8855              | 0.3211                  | ns                  |
| 1.0 Gy/fraction vs 2.0 Gy/fraction     | -0.3230 to 0.7733              | 0.6685                  | ns                  |
|                                        |                                |                         |                     |
| <b>CELL GROWTH</b>                     | <b>95% confidence interval</b> | <b>Adjusted p-Value</b> | <b>Significance</b> |
| Control vs 0.25 Gy/fraction            | -0.2438 to 0.5160              | 0.7628                  | ns                  |
| Control vs 0.5 Gy/fraction             | -0.05926 to 0.7006             | 0.1101                  | ns                  |
| Control vs 1.0 Gy/fraction             | 0.07255 to 0.8324              | 0.0189                  | *                   |
| Control vs 2.0 Gy/fraction             | 0.1538 to 0.9137               | 0.0065                  | **                  |
| 0.25 Gy/fraction vs 0.5 Gy/fraction    | -0.1954 to 0.5645              | 0.5296                  | ns                  |
| 0.25 Gy/fraction vs 1.0 Gy/fraction    | -0.06357 to 0.6963             | 0.1165                  | ns                  |
| 0.25 Gy/fraction vs 2.0 Gy/fraction    | 0.01773 to 0.7776              | 0.0394                  | *                   |
| 0.5 Gy/fraction vs 1.0 Gy/fraction     | -0.2481 to 0.5117              | 0.782                   | ns                  |
| 0.5 Gy/fraction vs 2.0 Gy/fraction     | -0.1668 to 0.5930              | 0.4014                  | ns                  |
| 1.0 Gy/fraction vs 2.0 Gy/fraction     | -0.2986 to 0.4612              | 0.9509                  | ns                  |

**Table S5.** Summary of one-way ANOVA on cell growth curves of B1 coefficients VH10 fibroblasts (12 fractions). DFRE during radiation exposure, PFRE post fractionated radiation exposure. Statistical analysis was carried out with GraphPad prism. \* represent p values <0.05, \*\* represents p values <0.01.

| <b>AHH-1 Lymphoblasts (10 fractions)</b> |                                |                         |                     |
|------------------------------------------|--------------------------------|-------------------------|---------------------|
| <b>DFRE</b>                              | <b>95% confidence interval</b> | <b>Adjusted p-Value</b> | <b>Significance</b> |
| Control vs 0.25 Gy/fraction              | -0.4889 to 0.2967              | 0.94                    | ns                  |
| Control vs 0.5 Gy/fraction               | -0.5307 to 0.2549              | 0.81                    | ns                  |
| Control vs 1.0 Gy/fraction               | -0.7431 to 0.04252             | 0.092                   | ns                  |
| Control vs 2.0 Gy/fraction               | -1.035 to -0.2496              | 0.0012                  | **                  |
| 0.25Gy/fraction vs 0.5 Gy/fraction       | -0.4346 to 0.3510              | 0.9972                  | ns                  |
| 0.25Gy/fraction vs 1.0 Gy/fraction       | -0.6470 to 0.1386              | 0.313                   | ns                  |
| 0.25Gy/fraction vs 2.0 Gy/fraction       | -0.9391 to -0.1535             | 0.0049                  | **                  |
| 0.5Gy/fraction vs 1.0 Gy/fraction        | -0.6052 to 0.1804              | 0.4797                  | ns                  |
| 0.5Gy/fraction vs 2.0 Gy/fraction        | -0.8973 to -0.1117             | 0.0093                  | **                  |
| 1.00Gy/fraction vs 2.0 Gy/fraction       | -0.6849 to 0.1007              | 0.1996                  | ns                  |
|                                          |                                |                         |                     |
| <b>PFRE</b>                              | <b>95% confidence interval</b> | <b>Adjusted p-Value</b> | <b>Significance</b> |
| Control vs 0.25 Gy/fraction              | -0.1603 to 0.3063              | 0.9878                  | ns                  |
| Control vs 0.5 Gy/fraction               | -0.02133 to 0.4453             | 0.6352                  | ns                  |
| Control vs 1.0 Gy/fraction               | 0.4766 to 0.9432               | 0.0023                  | **                  |
| Control vs 2.0 Gy/fraction               | 1.355 to 1.822                 | <0.0001                 | ****                |
| 0.25 Gy/fraction vs 0.5Gy/fraction       | -0.09433 to 0.3723             | 0.8849                  | ns                  |
| 0.25 Gy/fraction vs 1.0Gy/fraction       | 0.4036 to 0.8702               | 0.0057                  | **                  |
| 0.25 Gy/fraction vs 2.0Gy/fraction       | 1.282 to 1.749                 | <0.0001                 | ****                |
| 0.5 Gy/fraction vs 1.00 Gy/fraction      | 0.2646 to 0.7312               | 0.0339                  | *                   |
| 0.5 Gy/fraction vs 2.0 Gy/fraction       | 1.143 to 1.610                 | <0.0001                 | ****                |
| 1.0 Gy/fraction vs 2.0 Gy/fraction       | 0.6455 to 1.112                | 0.0003                  | ***                 |
|                                          |                                |                         |                     |
| <b>CELL GROWTH</b>                       | <b>95% confidence interval</b> | <b>Adjusted p-Value</b> | <b>Significance</b> |
| Control vs 0.25 Gy/fraction              | 0.01001 to 0.5234              | 0.0399                  | *                   |
| Control vs 0.5 Gy/fraction               | 0.3061 to 0.8195               | <0.0001                 | ****                |
| Control vs 1.0 Gy/fraction               | 0.8993 to 1.413                | <0.0001                 | ****                |
| Control vs 2.0 Gy/fraction               | 1.450 to 1.963                 | <0.0001                 | ****                |
| 0.25Gy/fraction vs 0.5 Gy/fraction       | 0.03941 to 0.5528              | 0.0203                  | *                   |
| 0.25Gy/fraction vs 1.0 Gy/fraction       | 0.6326 to 1.146                | <0.0001                 | ****                |
| 0.25Gy/fraction vs 2.0 Gy/fraction       | 1.183 to 1.696                 | <0.0001                 | ****                |
| 0.5Gy/fraction vs 1.0 Gy/fraction        | 0.3365 to 0.8498               | <0.0001                 | ****                |
| 0.5Gy/fraction vs 2.0 Gy/fraction        | 0.8867 to 1.400                | <0.0001                 | ****                |
| 1.00Gy/fraction vs 2.0 Gy/fraction       | 0.2936 to 0.8069               | <0.0001                 | ****                |

**Table S6.** Summary of one-way ANOVA on cell growth curves of B1 coefficients AHH-1 lymphoblasts (10 fractions). DFRE during radiation exposure, PFRE post fractionated radiation

# Supplementary figures

exposure. Statistical analysis was carried out with GraphPad prism. \* represent p values <0.05, \*\* represents p values <0.01, \*\*\* represents p values <0.001, \*\*\*\* represents p values <0.0001

| <b>FOCI</b>            | <b>3 Days PFRE</b>         |            |                                   |                             |
|------------------------|----------------------------|------------|-----------------------------------|-----------------------------|
| <b>Total foci (TF)</b> | <b><math>\alpha</math></b> | <b>STD</b> | <b>p-value (chi squared test)</b> | <b>(R<sup>2</sup> test)</b> |
| VH10 (9 fractions)     | 0.21                       | 0.18       | 0.028                             | 0.94                        |
| VH10 (12 fractions)    | 0.038                      | 0.020      | 0.041                             | 0.63                        |
| AHH-1 (10 fractions)   | 0.067                      | 0.029      | 0.589                             | 0.84                        |
| <b>Small foci (SF)</b> | <b><math>\alpha</math></b> | <b>STD</b> | <b>p-value (chi squared test)</b> | <b>(R<sup>2</sup> test)</b> |
| VH10 (9 fractions)     | 0.20                       | 0.17       | 0.047                             | 0.95                        |
| VH10 (12 fractions)    | 0.023                      | 0.014      | 0                                 | 0.60                        |
| AHH-1 (10 fractions)   | 0.053                      | 0.035      | 0.516                             | 0.86                        |
| <b>Large foci (LF)</b> | <b><math>\alpha</math></b> | <b>STD</b> | <b>p-value (chi squared test)</b> | <b>(R<sup>2</sup> test)</b> |
| VH10 (9 fractions)     | 0.0219                     | 0.0035     | 0.273                             | 0.92                        |
| VH10 (12 fractions)    | 0.0027                     | 0.0011     | 0.094                             | 0.72                        |
| AHH-1 (10 fractions)   | -0.0006                    | 0.0033     | 0.278                             | 0.66                        |

**Table S7.** Summary of  $\alpha$  coefficients from linear dose response relationship of foci data three days post fractionated radiation. STD represents  $\pm$  standard deviations. Statistical analysis was carried out with Python 3 software.

Supplementary figures

|                         | <b>7 Days PFRE</b> |            |           |            |           |            |                                   |                             |
|-------------------------|--------------------|------------|-----------|------------|-----------|------------|-----------------------------------|-----------------------------|
| <b>Total foci TF</b>    | <b>B0</b>          | <b>STD</b> | <b>B1</b> | <b>STD</b> | <b>B2</b> | <b>STD</b> | <b>p-value (chi squared test)</b> | <b>(R<sup>2</sup> test)</b> |
| VH10<br>(9 fractions)   | 0                  | 0          | -0.74     | 0.22       | 0.0603    | 0.015      | 0.186                             | 0.89                        |
| VH10<br>(12 fractions)  | 0                  | 0          | 0.0093    | 0.0091     | 0.0021    | 0.0011     | 0.114                             | 0.97                        |
| AHH-1<br>(10 fractions) | 0                  | 0          | -0.057    | 0.019      | 0.0014    | 0.0010     | 0.048                             | 0.66                        |
| <b>Small foci SF</b>    | <b>B0</b>          | <b>STD</b> | <b>B1</b> | <b>STD</b> | <b>B2</b> | <b>STD</b> | <b>p-value (chi squared test)</b> | <b>(R<sup>2</sup> test)</b> |
| VH10<br>(9 fractions)   | 0                  | 0          | -0.70     | 0.21       | 0.057     | 0.015      | 0.192                             | 0.88                        |
| VH10<br>(12 fractions)  | 0                  | 0          | 0.0076    | 0.0093     | 0.00223   | 0.00097    | 0.118                             | 0.96                        |
| AHH-1<br>(10 fractions) | 0                  | 0          | -0.053    | 0.019      | 0.0010    | 0.0011     | 0.063                             | 0.67                        |
| <b>Large foci LF</b>    | <b>B0</b>          | <b>STD</b> | <b>B1</b> | <b>STD</b> | <b>B2</b> | <b>STD</b> | <b>p-value (chi squared test)</b> | <b>(R<sup>2</sup> test)</b> |
| VH10<br>(9 fractions)   | 0                  | 0          | -0.0258   | 0.0031     | 0.00220   | 0.00024    | 0.009                             | 0.99                        |
| VH10<br>(12 fractions)  | 0                  | 0          | 0.0005    | 0.0013     | 0.00016   | 0.00014    | 0.236                             | 0.96                        |
| AHH-1<br>(10 fractions) | 0                  | 0          | -0.0029   | 0.0036     | 0.00027   | 0.00022    | 0.095                             | 0.47                        |

**Table S8.** Summary of B0, B1, and B2 coefficients from linear quadratic dose response relationship of foci data seven days post fractionated radiation. STD represents  $\pm$  standard deviations. Statistical analysis was carried out with Python 3 software.



|                         | <b>3 Days PFRE</b> |          |          |              |             |             |                      |
|-------------------------|--------------------|----------|----------|--------------|-------------|-------------|----------------------|
| <b>Micronuclei (MN)</b> | <b>a</b>           | <b>b</b> | <b>c</b> | <b>u (a)</b> | <b>u(b)</b> | <b>u(c)</b> | <b>R<sup>2</sup></b> |
| VH10 (9 fractions)      | -0.063             | 2.221    | 1.783    | 0.016        | 0.293       | 0.529       | 0.96                 |
| VH10 (12 fractions)     | -0.036             | 1.781    | -0.279   | 0.032        | 0.733       | 3.206       | 0.97                 |
| AHH-1 (10 fractions)    | 0.026              | 0.124    | 1.027    | 0.015        | 0.176       | 0.349       | 0.99                 |
|                         | <b>7 Days PFRE</b> |          |          |              |             |             |                      |
| <b>Micronuclei (MN)</b> | <b>a</b>           | <b>b</b> | <b>c</b> | <b>u (a)</b> | <b>u(b)</b> | <b>u(c)</b> | <b>R<sup>2</sup></b> |
| VH10 (9 fractions)      | 0.914              | 0.631    | 0.000    | 0.123        | 0.098       | 0.000       | 0.98                 |
| VH10 (12 fractions)     | 0.845              | 1.404    | 0.000    | 0.188        | 0.365       | 0.000       | 0.98                 |
| AHH-1 (10 fractions)    | 0.026              | 0.109    | 0.337    | 0.021        | 0.117       | 0.133       | 0.96                 |

**Table S9.** a, b and c coefficients from fitting MN frequency in both VH10 fibroblasts (after 9, and 12 fractions) and AHH-1 lymphoblasts, to a linear quadratic function 3 and 7 days PFRE. Statistical analysis was carried out with Python.

|                           | <b>3 Days PFRE</b> |          |              |             |                      |
|---------------------------|--------------------|----------|--------------|-------------|----------------------|
| <b>Nuclear buds (NBD)</b> | <b>a</b>           | <b>b</b> | <b>u (a)</b> | <b>u(b)</b> | <b>R<sup>2</sup></b> |
| VH10 (9 fractions)        | 0.510              | 0.331    | 0.112        | 0.139       | 0.960                |
| VH10 (12 fractions)       | 0.237              | 0.214    | 0.063        | 0.153       | 0.990                |
|                           |                    |          |              |             |                      |
|                           | <b>7 Days PFRE</b> |          |              |             |                      |
| <b>Nuclear buds (NBD)</b> | <b>a</b>           | <b>b</b> | <b>u (a)</b> | <b>u(b)</b> | <b>R<sup>2</sup></b> |
| VH10 (9 fractions)        | 0.534              | 0.440    | 0.230        | 0.219       | 0.940                |
| VH10 (12 fractions)       | 0.308              | 0.147    | 0.062        | 0.166       | 0.990                |

|                            | <b>3 Days PFRE</b> |          |              |             |           |
|----------------------------|--------------------|----------|--------------|-------------|-----------|
| <b>Nuclear buds (NBD)</b>  | <b>a</b>           | <b>b</b> | <b>u (a)</b> | <b>u(b)</b> | <b>R2</b> |
| <b>VH10 (9 fractions)</b>  | 0,510              | 0,331    | 0,112        | 0,139       | 0,960     |
| <b>VH10 (12 fractions)</b> | 0,237              | 0,214    | 0,063        | 0,153       | 0,990     |
|                            |                    |          |              |             |           |
|                            | <b>7 Days PFRE</b> |          |              |             |           |
| <b>Nuclear buds (NBD)</b>  | <b>a</b>           | <b>b</b> | <b>u (a)</b> | <b>u(b)</b> | <b>R2</b> |

|                            |       |       |       |       |       |
|----------------------------|-------|-------|-------|-------|-------|
| <b>VH10 (9 fractions)</b>  | 0,534 | 0,440 | 0,230 | 0,219 | 0,940 |
| <b>VH10 (12 fractions)</b> | 0,308 | 0,147 | 0,062 | 0,166 | 0,990 |

**Table S10.** a, and b coefficients from fitting NBD frequency in VH10 fibroblasts (after 9, and 12 fractions) to a linear function 3 and 7 days PFRE. Statistical analysis was carried out with Python.

|                               | <b>3 Days PFRE</b> |          |          |              |             |             |                      |
|-------------------------------|--------------------|----------|----------|--------------|-------------|-------------|----------------------|
| <b>Giant mononucleus (GN)</b> | <b>a</b>           | <b>b</b> | <b>c</b> | <b>u (a)</b> | <b>u(b)</b> | <b>u(c)</b> | <b>R<sup>2</sup></b> |
| <b>AHH-1 (10 fractions)</b>   | 0.018              | 0.146    | 0.364    | 0.020        | 0.122       | 0.134       | 0.94                 |
|                               | <b>7 Days PFRE</b> |          |          |              |             |             |                      |
| <b>Giant mononucleus (GN)</b> | <b>a</b>           | <b>b</b> | <b>c</b> | <b>u (a)</b> | <b>u(b)</b> | <b>u(c)</b> | <b>R<sup>2</sup></b> |
| <b>AHH-1 (10 fractions)</b>   | 0.025              | 0.047    | 0.428    | 0.017        | 0.194       | 0.395       | 0.99                 |

**Table S11.** a, b, and c coefficients from fitting GN frequency in AHH-1 lymphoblasts to a linear quadratic function 3 and 7 days PFRE. Statistical analysis was carried out with Python.

| <b>Colony formation</b> | <b>Coefficients</b>        |                           | <b>Standard deviation</b>  |                           | <b>R<sup>2</sup> value</b> |
|-------------------------|----------------------------|---------------------------|----------------------------|---------------------------|----------------------------|
|                         | <b><math>\alpha</math></b> | <b><math>\beta</math></b> | <b><math>\alpha</math></b> | <b><math>\beta</math></b> |                            |
| VH10 (9 fractions)      | 0.005                      | 0.0043                    | 0.021                      | 0.0019                    | 0.6030                     |
| VH10 (12 fractions)     | -0.027                     | 0.0033                    | 0.042                      | 0.0028                    | 0.4545                     |
| AHH-1 (10 fractions)    | -0.084                     | 0.0066                    | 0.02                       | 0.0016                    | 0.6646                     |

**Table S12.**  $\alpha$  and  $\beta$  coefficients from linear quadratic  $S = e^{-(D(a+\beta d))}$  data fitting for colony formation 10 days post fractionated radiation exposure

| VH10 fibroblasts<br>(9 fractions) | Coefficients |         | Standard error |         | R <sup>2</sup> values |
|-----------------------------------|--------------|---------|----------------|---------|-----------------------|
|                                   | $\alpha$     | $\beta$ | $\alpha$       | $\beta$ |                       |
| Control                           | 0.295        | 0.022   | 0.056          | 0.016   | 0.9865                |
| 0.25 Gy/fraction                  | -0.002       | 0.080   | 0.054          | 0.018   | 0.9847                |
| 0.5 Gy/fraction                   | 0.284        | 0.023   | 0.124          | 0.035   | 0.9370                |
| 1.0 Gy/fraction                   | 0.162        | 0.047   | 0.048          | 0.015   | 0.9895                |

**Table S13.**  $\alpha$  and  $\beta$  coefficients from linear quadratic data fitting  $S = e^{-(\alpha D + \beta D^2)}$  for radiosensitivity with clonogenic cell survival 20 days after radiation exposure. Survival curves for VH10 fibroblast was fit to linear quadratic equation, while AHH-1 survival curves were fit to a linear equation.

| AHH-1 lymphoblasts (10 fractions) | Coefficients | Standard error | R <sup>2</sup> values |
|-----------------------------------|--------------|----------------|-----------------------|
|                                   | $\alpha$     | $\alpha$       |                       |
| Control                           | -0.3611      | 0.02449        | 0.9666                |
| 0.25Gy/fraction                   | -0.3267      | 0.01884        | 0.9733                |
| 0.5 Gy/fraction                   | -0.3033      | 0.01961        | 0.9644                |
| 1.0 Gy/fraction                   | -0.2622      | 0.01426        | 0.9725                |
| 2.0 Gy/fraction                   | -0.2547      | 0.02627        | 0.9065                |

**Table S14.**  $\alpha$  coefficients from linear data fitting  $S = e^{-(\alpha D)}$  for the survival curves of AHH-1 20 days post fractionated radiation exposure
